# Supplementary material
Source: PubMed Central journal article supplement (PMC2096746)

Supplemental Fig. 2 - Nolde, et al.

A

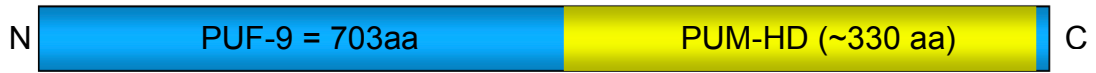

B

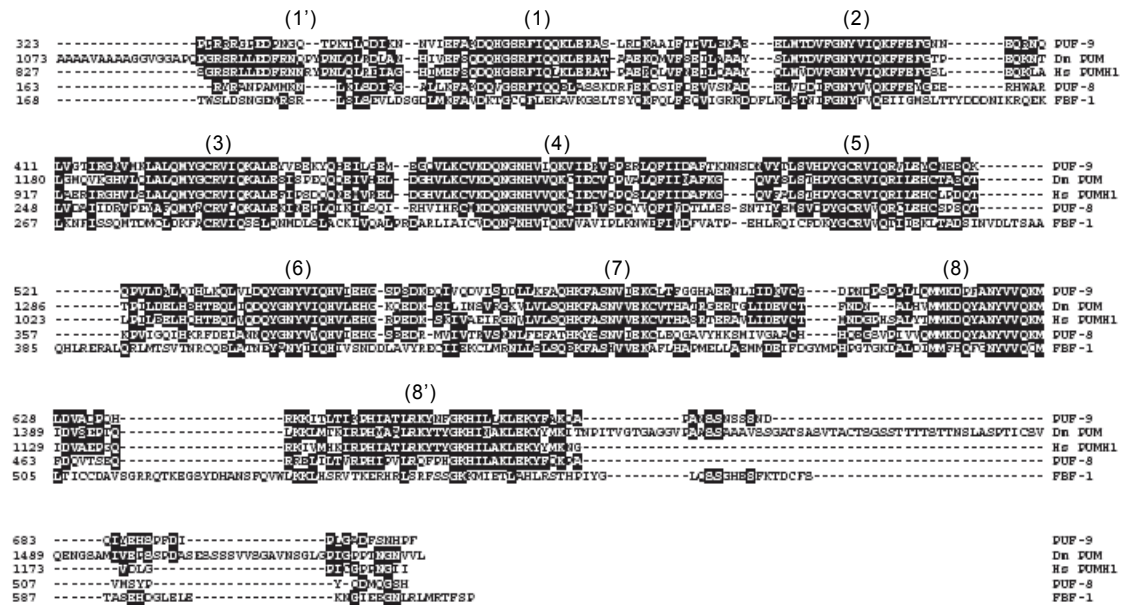

Decoration 'Decoration #1': Shade (with solid black) residues that match the Consensus exactly.

C

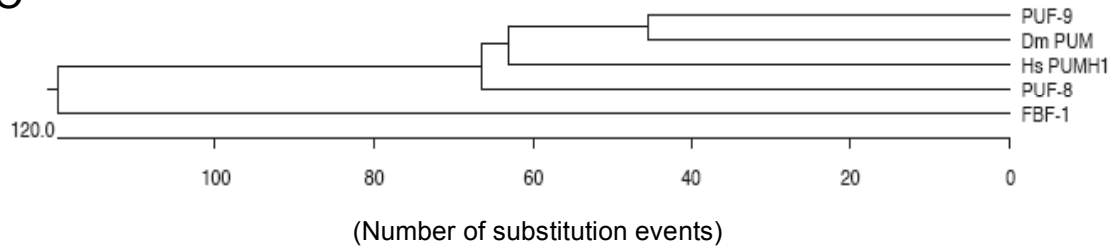

Supplement: NIHMS23260-supplement-02.pdf [file NIHMS23260-supplement-02.pdf]
