# Supplementary material
Source: PubMed Central journal article supplement (PMC2096746)
Supplement: NIHMS23260-supplement-05.pdf [file NIHMS23260-supplement-05.pdf]

Supplemental Fig. 5 - Nolde, et al.

| % animals with GFP brightness at a given level in the VNC for each stage |                       |     |    |    |    |     |     |
|--------------------------------------------------------------------------|-----------------------|-----|----|----|----|-----|-----|
| <b>BW1932</b>                                                            | GFP brightness level: | ≤ 1 | 2  | 3  | 4  | 5   | n = |
| Developmental stage scored:                                              | L1                    |     |    |    |    | 100 | 8   |
|                                                                          | L2                    |     |    |    | 56 | 44  | 9   |
|                                                                          | L3                    |     |    | 47 | 53 |     | 19  |
|                                                                          | early - mid L4        | 44  | 38 | 16 | 3  |     | 32  |
|                                                                          | late L4               | 95  | 5  |    |    |     | 21  |
|                                                                          | Adult                 | 95  | 5  |    |    |     | 63  |
| <i>puf-9(ok1136); BW1932</i>                                             |                       |     |    |    |    |     |     |
| <i>puf-9(ok1136); BW1932</i>                                             | GFP brightness level: | ≤ 1 | 2  | 3  | 4  | 5   | n = |
| Developmental stage scored:                                              | L1                    |     |    |    |    | 100 | 17  |
|                                                                          | L2                    |     |    |    |    | 100 | 10  |
|                                                                          | L3                    |     |    | 18 | 55 | 27  | 33  |
|                                                                          | early - mid L4        |     | 29 | 50 | 21 |     | 14  |
|                                                                          | late L4               | 11  | 17 | 61 |    | 11  | 18  |
|                                                                          | Adult                 | 35  | 22 | 35 | 8  |     | 63  |
