# Supplementary material
Source: PubMed Central journal article supplement (PMC2096746)
Supplement: NIHMS23260-supplement-09.pdf [file NIHMS23260-supplement-09.pdf]

Supplemental Fig. 9 - Nolde, et al.

Oligonucleotide Sequences

| <b>Primer Name</b> | <b>Sequence (5' – 3')</b>                            |
|--------------------|------------------------------------------------------|
| PUF9A              | CAGACTTTGCCGGCTAGAACTATAGAGC                         |
| PUF9B              | GACATTGTGATAACCGTGCGTGTCTATC                         |
| PUF9GFP            | AGTCGACCTGCAGGCATGCAAGCTAAGATTTATTGA<br>CTTCCGGGGTAC |
| GFFAK9             | AGCTTGCATGCCTGCAGGTCGACT                             |
| GFP2C              | GGAAACAGTTATGTTTGGTATATTGGG                          |
| ONS1               | CTCAGAGCGTGTTATTATCTACTATGTACCCCTCTT<br>ATTA ACTTCG  |
| ONS2               | TAATAAGAGGGGTACATAGTAGATAATAACACGCTC<br>TGAGAGTAC    |
| SJA2               | CATGCCATGGCAAATGAAATCAATAGAAAATGA                    |
| SJA3               | CATGCCATGGGGGGAGGTA CTACATGTA CTGAG                  |
| SJA4               | CATGCCATGGGATAATAACACGCTCTGAGAGTAC                   |
| SJA5               | ATCCCCGCGGGTACTCTCAGAGCGTGTTATTATC                   |
| NRE1MFW            | GTTATTATCTAGAAGCAATAAAATACTGTTCTC                    |
| NRE1MRV            | ATTGCTTCTAGATAATAACACGCTCTGAGAGTA                    |
| NRE2MFW            | AGTACCTCCCCCAGAATACTAAATTCTGTTACT                    |
| NRE2MRV            | AGTATTCTGGGGGAGGTA CTACATGTA CTGAGA                  |
| F13D11(16)         | ATCCCCGCGGGGACGTCCTCGTTAAGGAAACAC                    |
| F13D11(17)         | CATGCCATGGTGCTTCAAGATGCTTTTTTATTGG                   |
