# Supplementary material
Source: PubMed Central journal article supplement (PMC2096746)

Supplemental Fig. 1 - Nolde, et al.

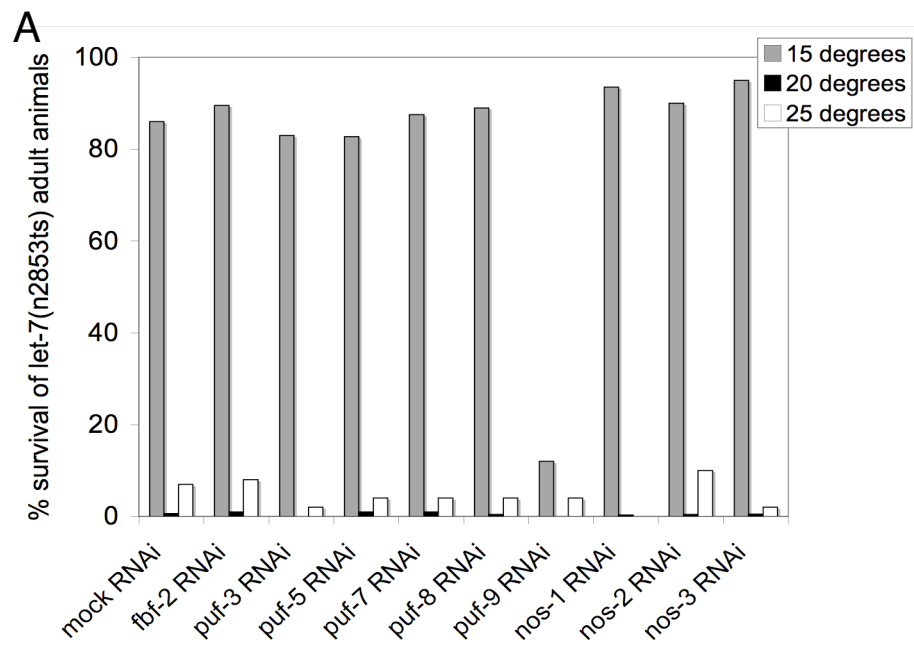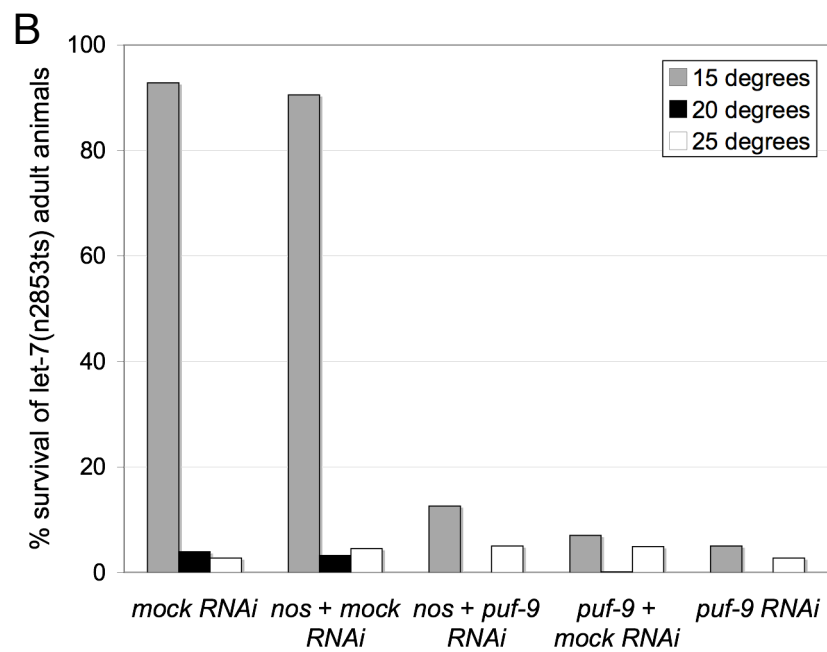

Supplement: NIHMS23260-supplement-01.pdf [file NIHMS23260-supplement-01.pdf]

Supplemental Fig. 3 - Nolde, et al.

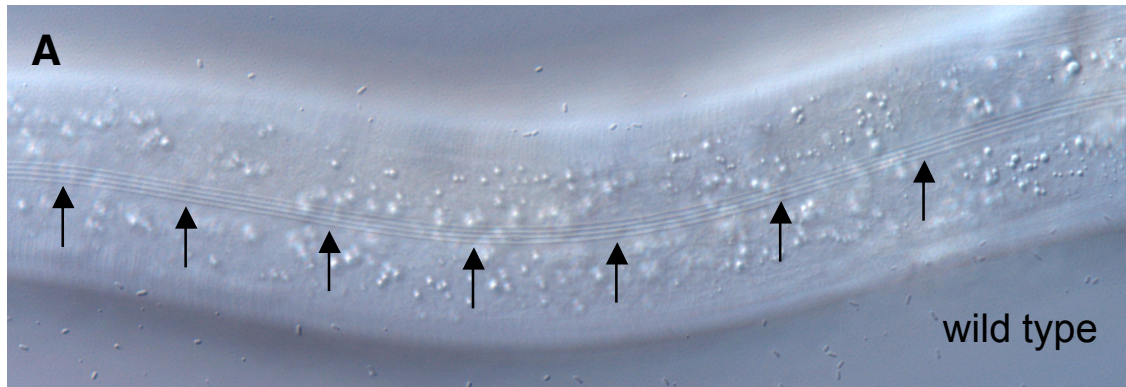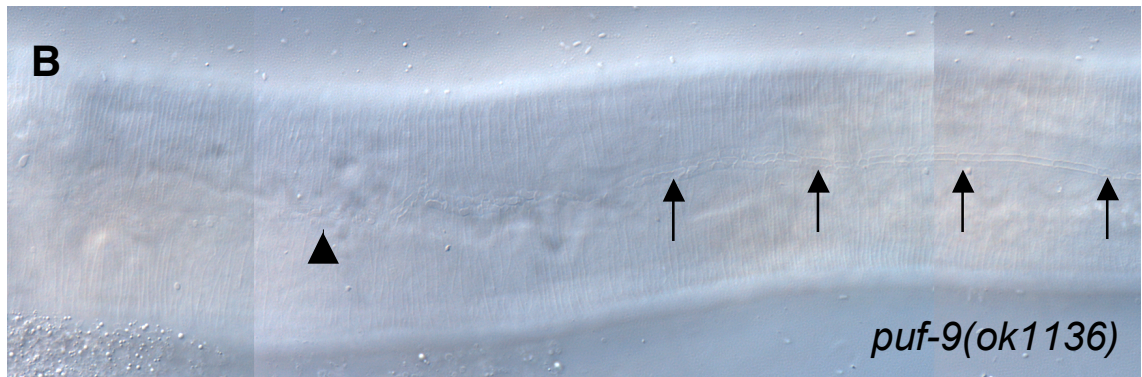

Supplement: NIHMS23260-supplement-03.pdf [file NIHMS23260-supplement-03.pdf]

Supplemental Fig. 4 - Nolde, et al.

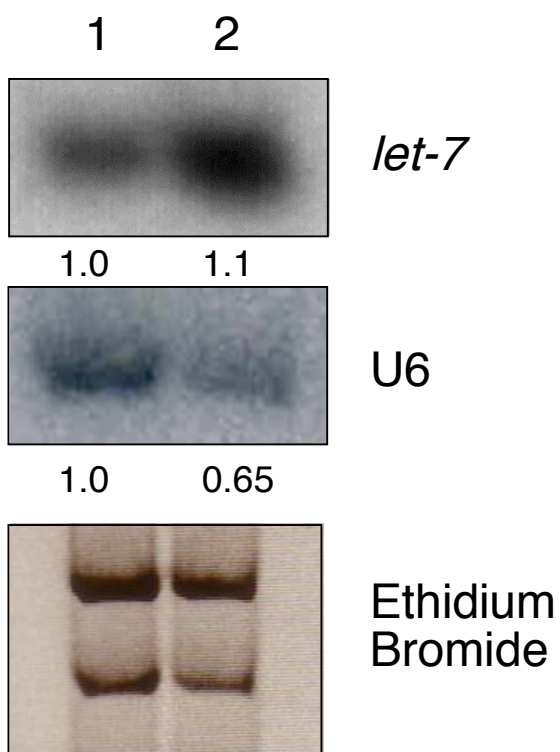

Supplement: NIHMS23260-supplement-04.pdf [file NIHMS23260-supplement-04.pdf]

Supplemental Fig. 8 - Nolde, et al.

A

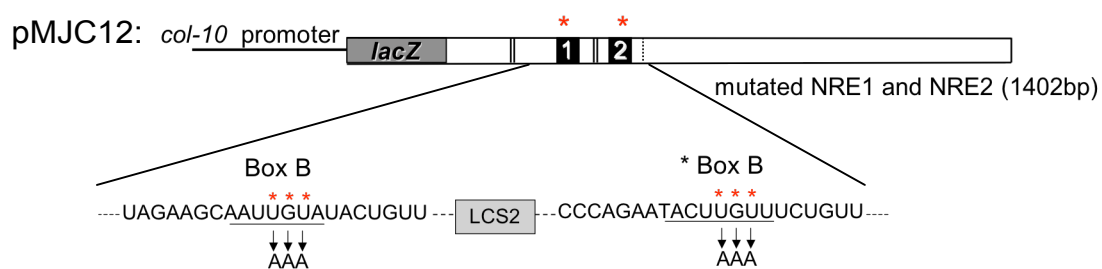

B

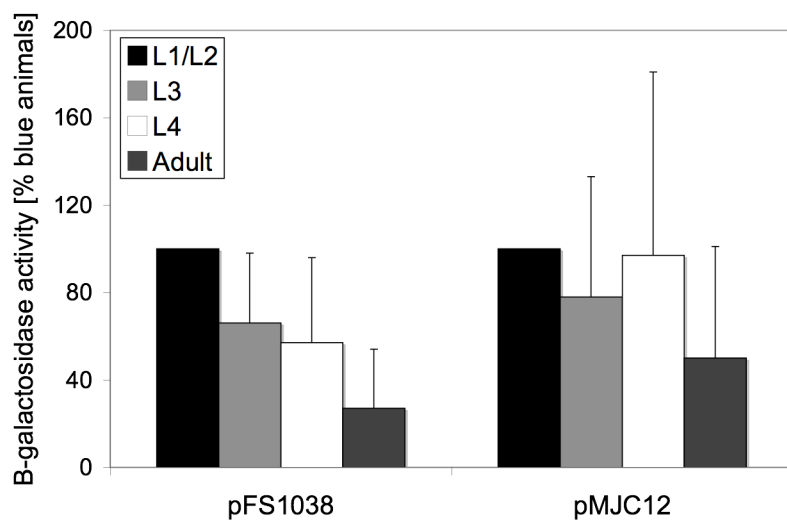

Supplement: NIHMS23260-supplement-08.pdf [file NIHMS23260-supplement-08.pdf]
